# Supplementary material
Source: PubMed Central journal article supplement (PMC3203546)

# Supporting Information

## Efficient Ligation of the *Schistosoma* Hammerhead Ribozyme

Marella D. Canny, Fiona M. Jucker, and Arthur Pardi\*

Department of Chemistry and Biochemistry, University of Colorado at Boulder, Boulder, CO 80309-0215

Figure S1. The *trans* constructs of hammerhead ribozymes derived from cave crickets (*Dolichopoda Baccettii* and *Dolichopoda schiavazzii*) and the positive and negative strands of the Avocado sunblotch viroid (ASBVd(+)) and ASBVd(-)) used in single turnover cleavage and ligation experiments. See the legend for Figure 1 in the paper for details of constructs.

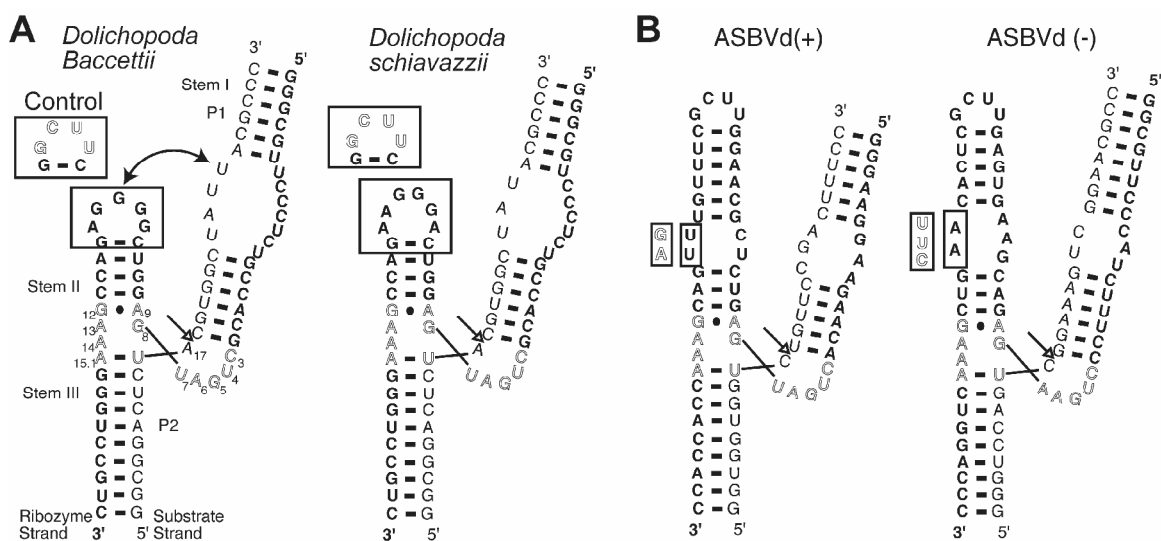

Supplement: NIHMS62069-supplement-File011.pdf [file NIHMS62069-supplement-File011.pdf]
